# Supplementary material for: Graphene/silver nanowire aerogel sponge for highly effective electromagnetic energy attenuation
Source: Royal Society of Chemistry journal article supplement (doi:10.1039/d3ce01254a), 2024-01-01
Supplement: d3ce01254a1.pdf [file d3ce01254a1.pdf]

## Supporting Information

### Graphene/silver nanowire aerogel sponge for highly effective electromagnetic energy attenuation

Shu-Qing Lv,<sup>‡a</sup> Hua-Long Peng,<sup>‡b</sup> Yu Zhang,<sup>ab</sup> Xiao-Bo Sun,<sup>b\*</sup>  
Guang-Sheng Wang<sup>b\*</sup>

<sup>a</sup> School of Civil Engineering and Architecture, Northeast Electric Power University,  
Jilin 132012, PR China

<sup>b</sup> School of Chemistry, Beihang University, Beijing 1000191, PR China

\*Corresponding Author Xiao-Bo Sun(E-mail:sunxb@buaa.edu.cn) and Guang-Sheng  
Wang(E-mail: wanggsh@buaa.edu.cn)

## 1.1 MA performances of all samples

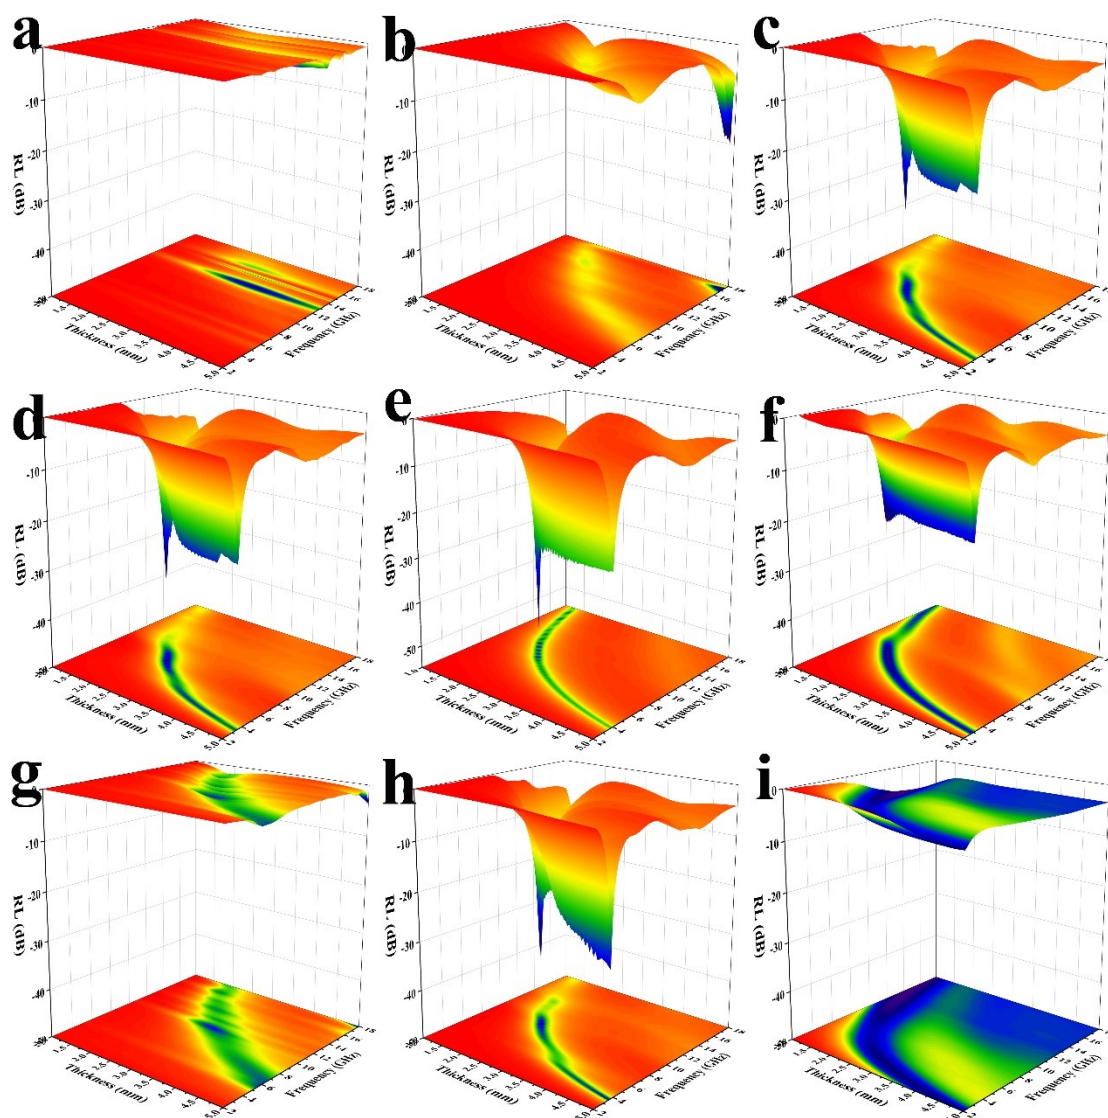

Figure S1. 3D RL maps of G@AgNW aerogel sponges with different filler loading, (a) G@AgNW-1/1wt%, (b) G@AgNW-1/5wt%, (c) G@AgNW-1/10wt%, (d) G@AgNW-2/1wt%, (e) G@AgNW-2/5wt%, (f) G@AgNW-2/10wt%, (g) G@AgNW-3/1wt%, (h) G@AgNW-3/5wt%, (i) G@AgNW-3/10wt%.

## 1.2 RL contour maps of G@AgNW aerogel sponges with different filler loading

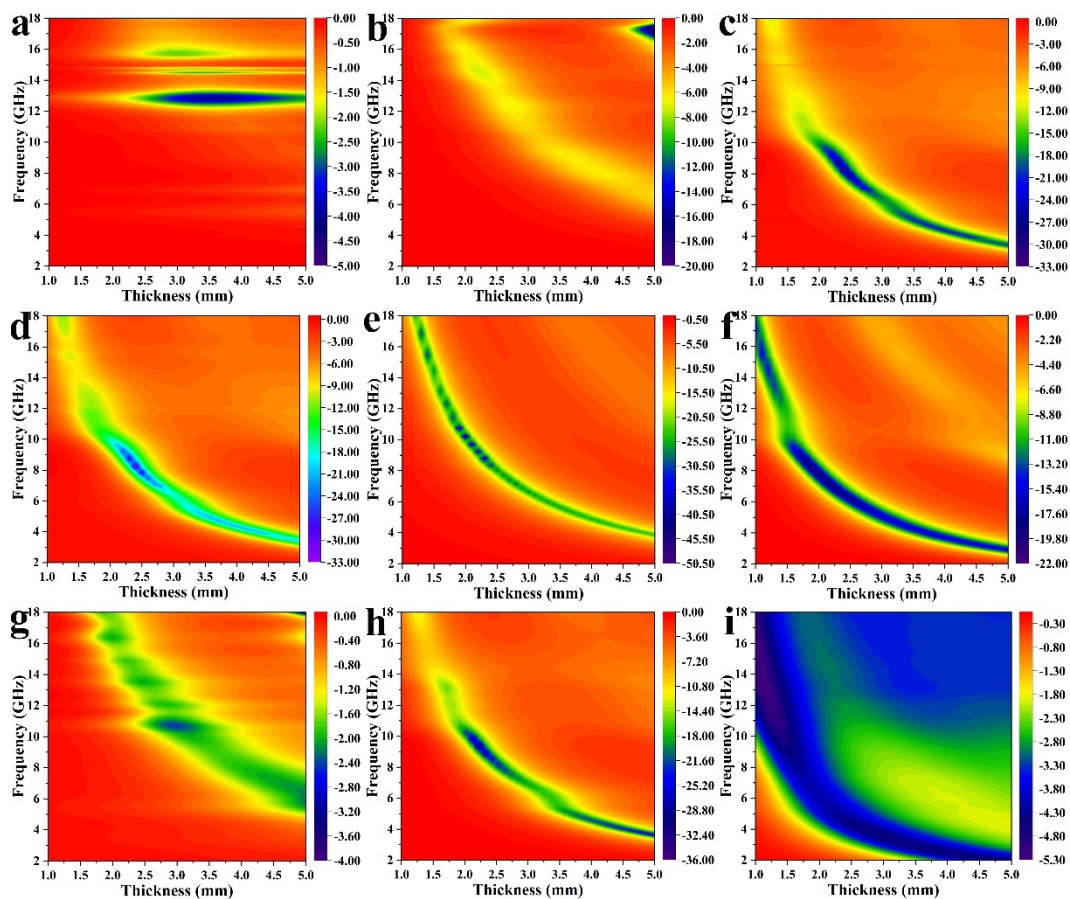

Figure S2. contour RL maps of G@AgNW aerogel sponges with different filler loading, (a) G@AgNW-1/1wt%, (b) G@AgNW-1/5wt%, (c) G@AgNW-1/10wt%, (d) G@AgNW-2/1wt%, (e) G@AgNW-2/5wt%, (f) G@AgNW-2/10wt%, (g) G@AgNW-3/1wt%, (h) G@AgNW-3/5wt%, (i) G@AgNW-3/10wt%.

### 1.3 3D contour $|Z_{in}/Z_0|$ values maps of G@AgNW aerogel sponges with different filler loading

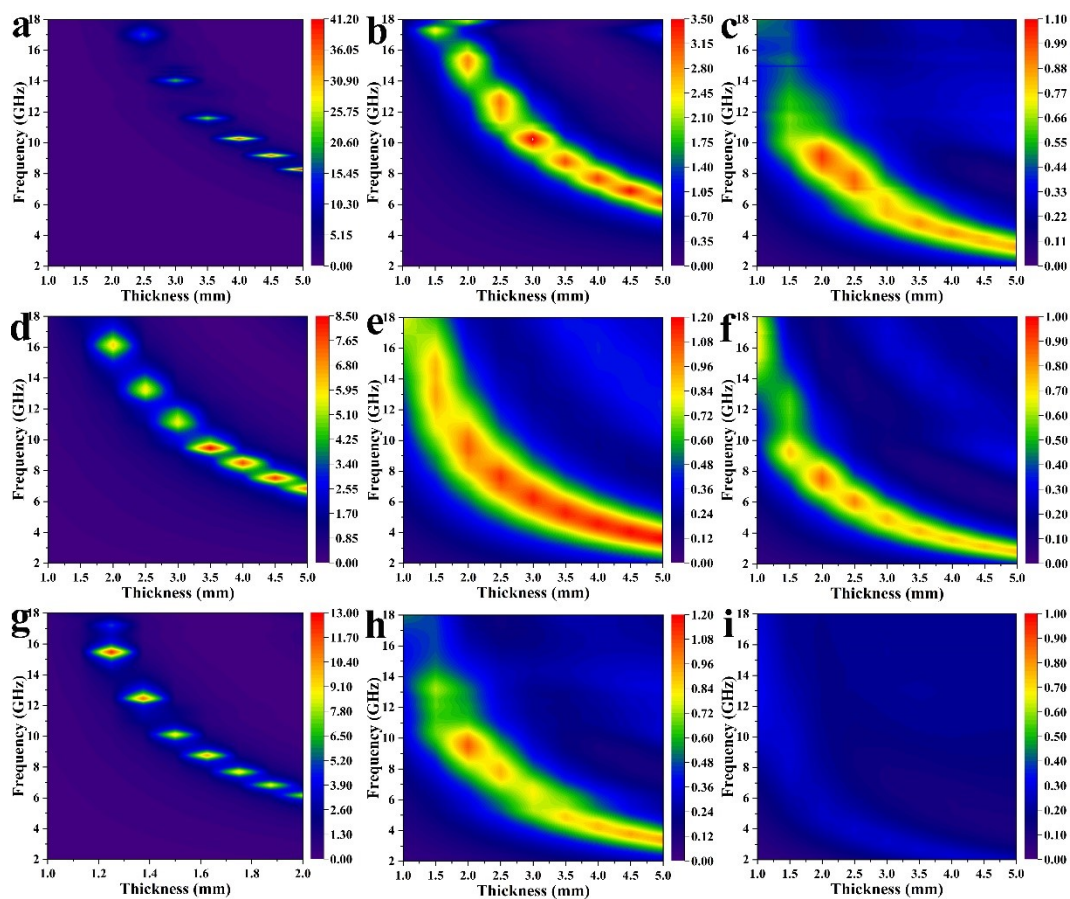

Figure S3. 3D contour  $|Z_{in}/Z_0|$  values maps of G@AgNW aerogel sponges with different filler loading, (a) G@AgNW-1/1wt%, (b) G@AgNW-1/5wt%, (c) G@AgNW-1/10wt%, (d) G@AgNW-2/1wt%, (e) G@AgNW-2/5wt%, (f) G@AgNW-2/10wt%, (g) G@AgNW-3/1wt%, (h) G@AgNW-3/5wt%, (i) G@AgNW-3/10wt%.
